# Supplementary material for: The FGF21 analog pegozafermin in severe hypertriglyceridemia: a randomized phase 2 trial
Source: PubMed Central journal article supplement (PMC10353930; doi:10.1038/s41591-023-02427-z), 2023-06-24
Supplement: 41591_2023_2427_MOESM1_ESM.pdf [file 41591_2023_2427_MOESM1_ESM.pdf]

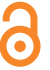

---

# The FGF21 analog pegozafermin in severe hypertriglyceridemia: a randomized phase 2 trial

---

In the format provided by the authors and unedited

---

## TABLE OF CONTENTS

|                                            |                   |
|--------------------------------------------|-------------------|
| Supplementary Note One: Investigators..... | <a href="#">2</a> |
|--------------------------------------------|-------------------|

**Supplementary Note One: ENTRIGUE Principal Investigators**

| <b>Principal Investigator</b>  | <b>Site</b>                                               |
|--------------------------------|-----------------------------------------------------------|
| Robert Perry, MD*              | Panax Clinical Research; Miami Lakes, FL                  |
| Douglas Denham, MD             | Clinical Trials of Texas, Inc.; San Antonio, TX           |
| Obadias Marquez, MD            | ClinSearch; Chattanooga, TN                               |
| Harold Bays, MD*               | L-MARC Research Center; Louisville, KY                    |
| Miguel Trevino, MD*            | Innovative Research of West Florida; Clearwater, FL       |
| Jennifer Bellucci-Jackson, MD* | Family Medicine Specialists, Inc.; Wauconda, IL           |
| Nabil Andrawis, MD*            | Manassas Clinical Research Center; Manassas, VA           |
| Omar Benitez, MD*              | South Florida Research Center, Inc.; Miami, FL            |
| Michael Gould, MD*             | Burke Primary Care; Morgantown, NC                        |
| Vanna Gold, MD*                | Family Medicine Clinic Science; Lampasas, TX              |
| James Cain, MD*                | Family Medicine Clinic Science; Lampasas, TX              |
| Bhola Rama, MD*                | Rama Research, LLC; Marion, OH                            |
| Randall Huling, MD             | Olive Branch Family Medical Center; Olive Branch, MS      |
| John Lentz, MD*                | Georgia Clinical Research, LLC; Lawrenceville, GA         |
| Lucas Groban, MD               | The Iowa Clinic; Des Moines, IA                           |
| Nasser Khan, MD                | The Iowa Clinic; Des Moines, IA                           |
| Robert Busch, MD*              | Albany Medical Center; Albany, NY                         |
| Lon Lynn, MD*                  | Clinical Research of West Florida, Inc.; Tampa, FL        |
| Aslam Loya, MD                 | Coastal Medical Group; Houston, TX                        |
| Humberto Cruz, MD*             | Florida Institute for Clinical Research; Orlando, FL      |
| Walter Pharr, MD*              | Medication Management, LLC; Greensboro, NC                |
| Eveline Stock, MD              | University of California San Francisco; San Francisco, CA |

| <b>Principal Investigator</b> | <b>Site</b>                                                                                 |
|-------------------------------|---------------------------------------------------------------------------------------------|
| Matthew Braddock, MD          | Westside Center for Clinical Research; Jacksonville, FL                                     |
| Colby Grossman, MD*           | Palmetto Conical Research; Summerville, SC 29485                                            |
| Cara East, MD*                | Baylor Scott & White; Dallas, TX                                                            |
| Wissam Derian, MD*            | Quincy Medical Group; Quincy, IL                                                            |
| Cynthia Brinson, MD           | Central Texas Clinical Research; Austin, TX                                                 |
| Cindy Martinez, MD            | Project 4 Research; Miami, FL                                                               |
| Giselle Debs-Perez, MD*       | Harmony Clinical Research Center; North Miami Beach, FL                                     |
| Najmuddin Karimjee, MD        | DM Clinical Research/APD Clinical Research; Magnolia, TX                                    |
| Venu Prabaker, MD             | CareMD Associates; La Mesa, CA                                                              |
| Curtis Jantzi, MD             | Holston Medical Group, P.C.; Kingsport, TN                                                  |
| Chrisette Dharma, MD          | Southwest Family Medicine Associates; Dallas, TX                                            |
| Jose Cevallos-Yepe, MD        | Finlay Medical Research Corp.; Greenacres, FL                                               |
| William Sanchez, MD*          | Floridian Clinical Research; Miami Lakes, FL                                                |
| Nonna Nowak, MD*              | ClinicMed Daniluk, Nowak Spółka Jawna; Bialystok, Poland                                    |
| Stanislaw Mazur, MD*          | Centrum Medyczne Medyk; Rzeszow, Poland                                                     |
| Witold Zmuda, MD*             | Medicome Sp. z o.o.; Oswiecim, Poland                                                       |
| Anna Ocicka-Kozakiewicz, MD   | Nasz Lekarz Przychodnie Medyczne; Torun, Poland                                             |
| Maciej Banach, MD*            | Instytut Centrum Zdrowia Matki Polki; Lodz, Poland                                          |
| Pawel Bogdanski, MD           | Centrum Zdrowia Metabolicznego Pawel Bogdanski; Poznan, Poland                              |
| Katarzyna Wasilewska, MD*     | ZDROWIE Osteo-Medic; Bialystok, Poland                                                      |
| Jana Cepova, MD*              | Fakultni Nemocnice (FN) v Motole (Motol University Hospital); Prague, Czech Republic        |
| Tomas Hala, MD                | Center for Clinical and Basic Research (CCBR)-Synarc – Pardubice; Pardubice, Czech Republic |

| <b>Principal Investigator</b> | <b>Site</b>                                                                 |
|-------------------------------|-----------------------------------------------------------------------------|
| Věra Adámková, MD*            | IKEM – Institut Klinické a Experimentální Medicíny; Praha 4, Czech Republic |
| Marketa Hovorková, MD*        | IKEM – Institut Klinické a Experimentální Medicíny; Praha 4, Czech Republic |
| Eva Zidkova, MD               | Corintez s.r.o.; Prague, Czech Republic                                     |
| Roman Gregar, MD              | Clintrial s.r.o; Prague, Czech Republic                                     |
| Ferenc Lakatos, MD*           | Belgyogyaszati es Kardiologiai Maganrendelo; Bekescsaba, Hungary            |
| Andrea Hornyik, MD*           | Clinical Research Units Hungary; Miskolc, Borsod-Abauj-Zemplen, Hungary     |
| Denes Pall, MD*               | Debreceni Egyetem; Debrecen, Hungary                                        |
| Eleonora Beke, MD*            | Szent Margit Rendelointezet; Budapest, Hungary                              |
| Laszlo Konyves, MD*           | Lausmed Kft.; Baja, Hungary                                                 |

\* Principal investigators who randomized at least one subject.
